# Supplementary material
Source: publisher site journal article supplement (https://www.kjim.org/upload/media/kjim-2022-084_suppl5.pdf)
Supplement: Supplementary file 1 [file kjim-2022-084_suppl5.pdf]

**Supplementary Table 5. Infection and onset times**

| Variable                            | HAP or VAP (n = 73) | BSI or CLABSI (n = 36) | CAUTI (n = 17)  |
|-------------------------------------|---------------------|------------------------|-----------------|
| Days from hospital admission        | 5.0 (4.0–11.5)      | 17.0 (8.8–26.5)        | 11.0 (0.0–20.0) |
| Days from symptom onset             | 12.0 (8.5–16.5)     | 21.5 (14.3–31.0)       | 14.0 (3.5–25.0) |
| Days from intubation (only for VAP) | 8.5 (5.0–18.5)      |                        |                 |

Values are presented as median (interquartile range).

HAP, hospital acquired pneumonia; VAP, ventilator associated pneumonia; BSI, bloodstream infection; CLABSI, central line-associated bloodstream infection; CAUTI, catheter-associated urinary tract infection.
